# Supplementary material for: Myeloid-Derived Suppressive Cells Deficient in Liver X Receptor α Protected From Autoimmune Hepatitis
Source: PubMed Central journal article supplement (PMC8427166; doi:10.3389/fimmu.2021.732102), 2021-08-26
Supplement: DataSheet_1.pdf [file DataSheet_1.pdf]

Supplementary Table 1. Clinical characteristics of AIH and healthy controls who provided peripheral blood samples for flow cytometry tests.

|               | AIH<br>(n=14) | HC<br>(n=10) |
|---------------|---------------|--------------|
| Age (years)   | 46.9±2.7      | 42.3±2.0     |
| Gender (F/M)  | 13/1          | 8/2          |
| ALT (U/L)     | 101.7±28.5    | NA           |
| AST (U/L)     | 149.9±30.4    | NA           |
| AKP(U/L)      | 137.4±20.7    | NA           |
| GGT (U/L)     | 103.8±24.1    | NA           |
| TBIL (µmol/L) | 34.7±16.1     | NA           |
| IgG (g/L)     | 20.99±1.7     | NA           |

F/M, female and male; NA, not applicable; data were shown as mean ± standard error (SEM).

A

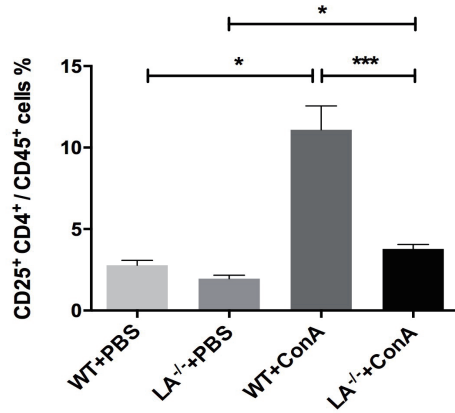

B

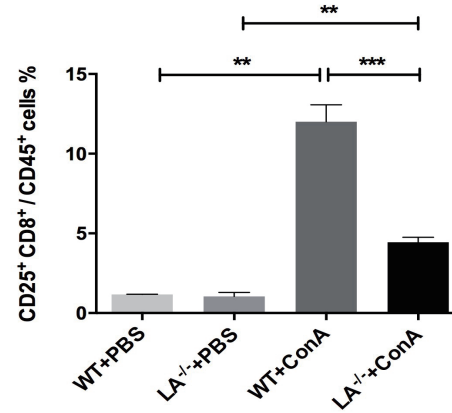

C

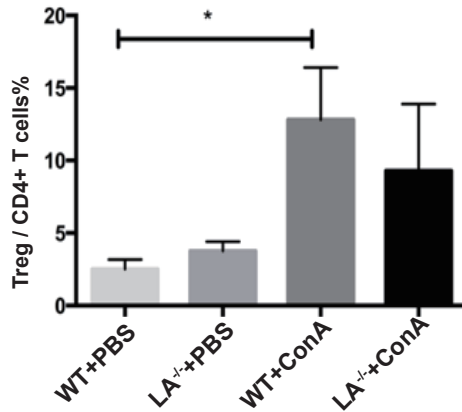

D

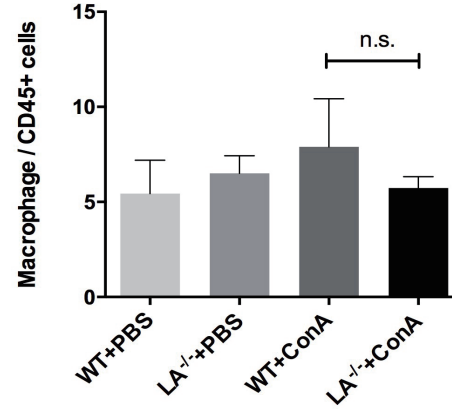

Supplementary Figure 1. Flow cytometry analysis of liver mononuclear cells after 24-hour treatment of ConA. A decreased frequency of liver (A) CD25<sup>+</sup>CD4<sup>+</sup> T cells and (B) CD25<sup>+</sup>CD8<sup>+</sup> T cells was observed in LXR $\alpha$ <sup>-/-</sup> mice. However, there is no significant difference in liver (C) Tregs or (D) macrophages between WT and LXR $\alpha$ <sup>-/-</sup> mice.

A

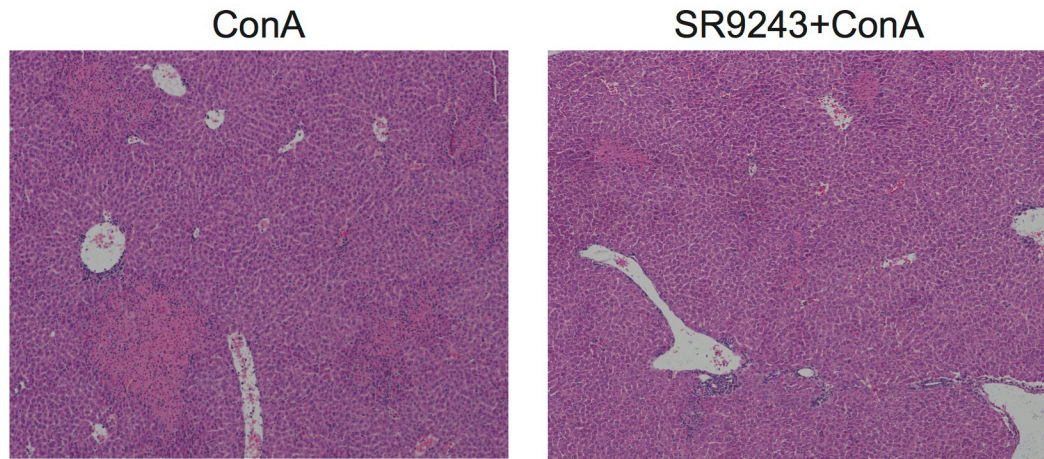

B

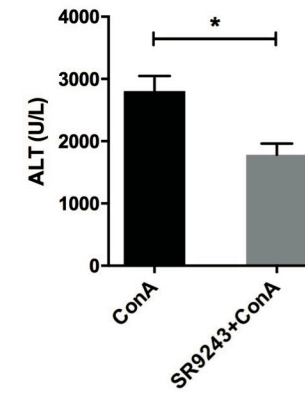

C

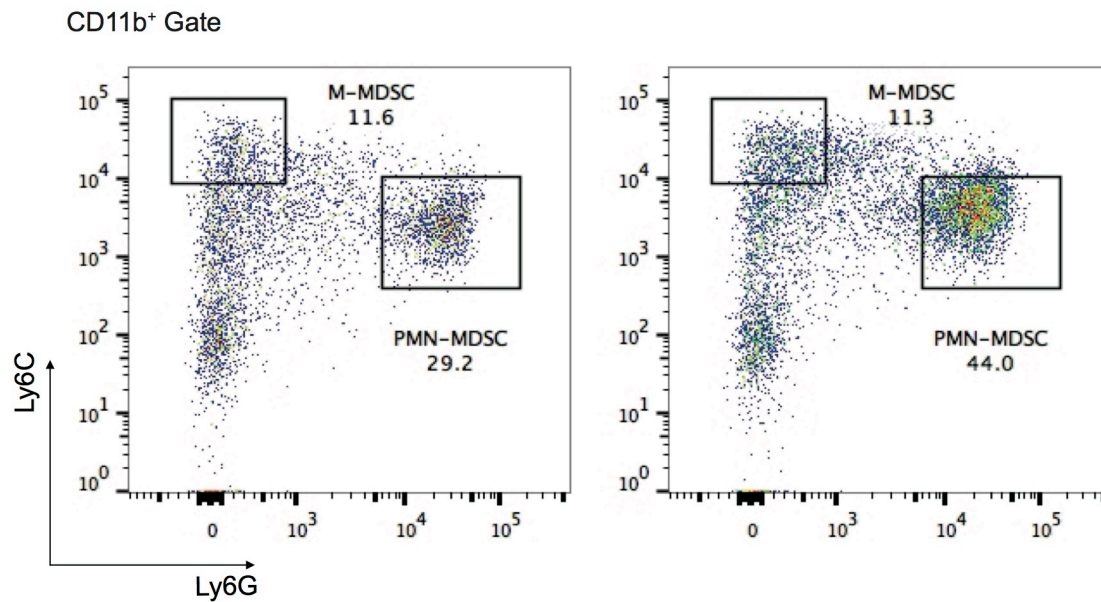

D

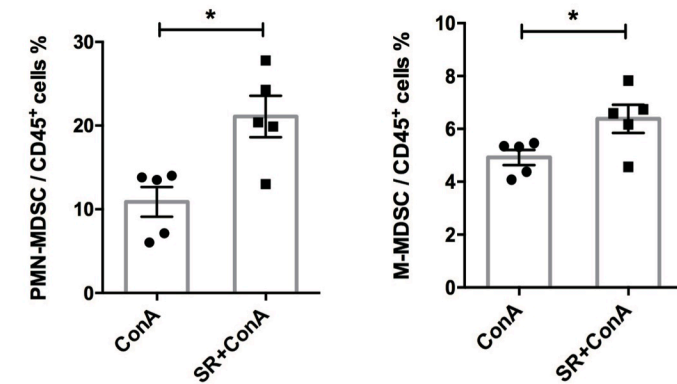

Supplementary Figure 2. Inhibition of LXR promoted expansion of hepatic MDSCs. To antagonizing LXR, WT mice were given LXR inverse agonist SR9243 (30mg/kg, Selleckchem) i.p. twice at 24h and 1h before ConA treatment. (A) Representative H&E staining ( $\times 100$ ) of livers WT mice treated with vehicle or SR9243. (B) Serum levels of ALT. (C, D) Hepatic PMN-MDSCs and M-MDSCs were investigated by flow cytometry.

A

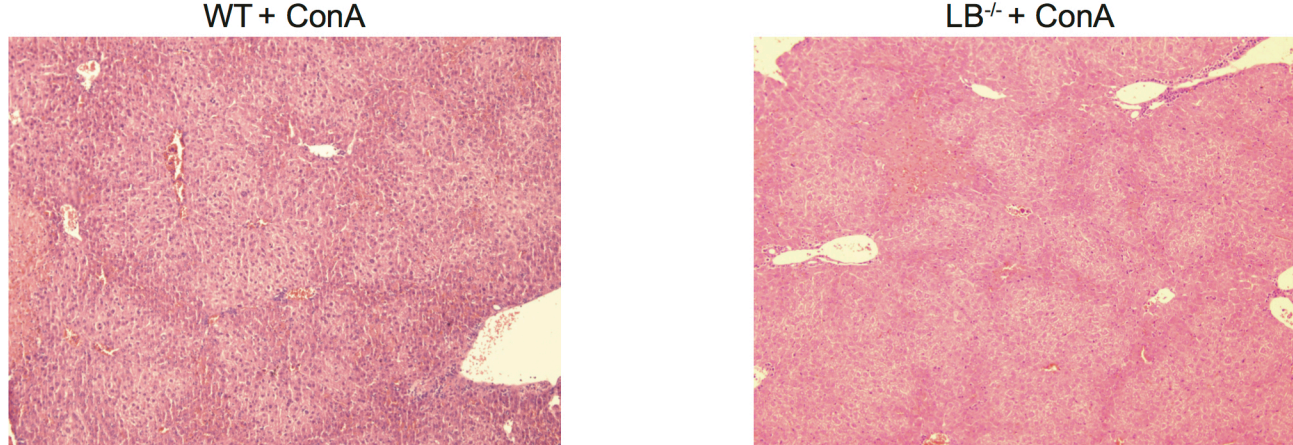

B

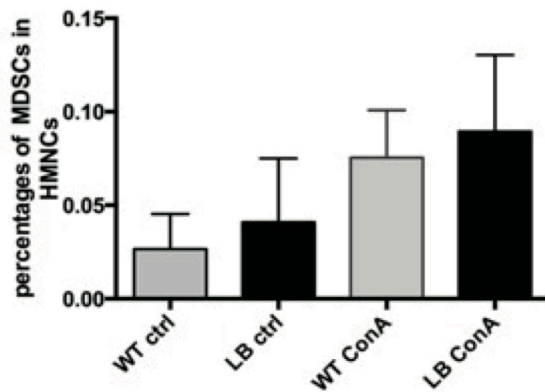

C

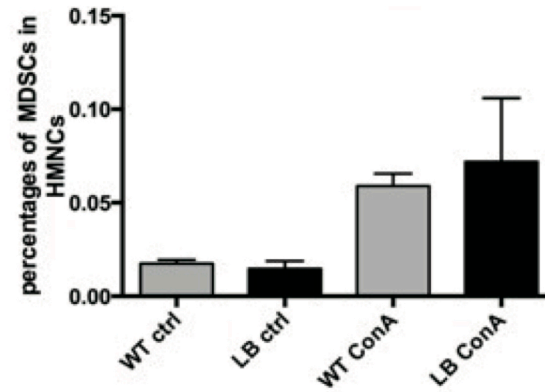

Supplementary Figure 3. Deficiency in LXR $\beta$  exhibited no impacts on ConA-induced hepatitis or expansion of MDSCs. (A) Representative H&E staining ( $\times 100$ ) of livers in WT or LXR $\beta$   $-/-$  mice injected i.v. with ConA for 24h. Percentage of liver (B) PMN-MDSC and (C) M-MDSC in WT and LXR $\beta$  knockout mice following treatment of PBS or ConA.
